# Supplementary material for: Clinical Management of High and Very High Risk Patients with Hyperlipidaemia in Central and Eastern Europe: An Observational Study
Source: Springer Nature journal article supplement (doi:10.1007/s12325-019-0879-1), 2019-02-13
Supplement: MOESM1 [file 16469222]

| **SUPPLEMENTARY TABLES**  **Table S1. Patient disposition** | | | | | | |
| --- | --- | --- | --- | --- | --- | --- |
|  | Overall | FH | Secondary Prevention | Diabetic | STEMI | Statin-Intoleranta |
| Follow-up | | | | | | |
| Retrospective | 1244 (100.0%) | 307 | 943 | 528 | 208 | 127 |
| Prospective | 582 (46.8%) | 31 | 403 | 310 | 75 | 34 |
|  | | | | | | |
| No. of LDL-C values from 1 year prior to enrollmentb | | | | | | |
| 2 | 943 (75.8%) | 268 | 715 | 373 | 156 | 75 |
| ≥3 | 301 (24.2%) | 39 | 228 | 155 | 52 | 52 |
|  | | | | | | |
| No. of LDL-C values from 1 year prior to enrollment to End of Studyb | | | | | | |
| 2 | 602 (48.4%) | 242 | 482 | 198 | 112 | 47 |
| ≥3 | 642 (51.6%) | 65 | 461 | 330 | 96 | 80 |
| Discontinued studyc | 7 (0.6%) | 0 | 6 | 3 | 0 | 0 |
| FH=Familial hypercholesterolaemia; STEMI=ST-segment elevation myocardial infarction.  a Patients can belong to ≥1 subgroup. Statin intolerance was defined as having had symptoms of statin intolerance.  b Patients with <2 LDL-C values during the retrospective phase were not eligible for the study.  c Due to death (n=4), loss to follow-up (2) or patient decision (1). | | | | | | |

**Table S2** Lifestyle risk factors for the study population (N=1244)

| Current Smoker | | Yes | | 179 (14.4%) |
| --- | --- | --- | --- | --- |
|  | | No | | 930 (74.8%)a |
|  | | Unknown | | 135 (10.9%) |
| Alcohol ≥3 units/day | | Yes | | 32 (2.6%) |
|  | | No | | 985 (79.2%) |
|  | | Unknown | | 227 (18.2%) |
| Low Calorie Diet | | Yes | | 367 (29.5%) |
|  | | No | | 547 (44.0%) |
|  | | Unknown | | 330 (26.5%) |
| Cholesterol-Lowering Diet | | Yes | | 706 (56.8%) |
|  | | No | | 249 (20.0%) |
|  | | Unknown | | 289 (23.2%) |
| Physical Activity | | Sedentary (Little/No Exercise) | | 347 (27.9%) |
|  | | Lightly Active (1-3 Days/Week) | | 301 (24.2%) |
|  | | Moderately Active (3-5 Days/Week) | | 187 (15.0%) |
|  | | Very Active (6-7 Days/Week) | | 48 (3.9%) |
|  | | Unknown | | 361 (29.0%) |
|  | **Total** | | **1244 (100%)** | |

a 276 (22.2%) were former smokers,

| **Table S3**. Non-statin lipid-modifying therapies by type, dose and frequency at the start of the observation period (N=1244) | | | | |
| --- | --- | --- | --- | --- |
| Type | Medication | Dose | Frequency | No. of patients (%) |
| Cholesterol Absorption Inhibitors | Ezetimibe | 10 mg | Daily | 162 (13.0%) |
|  |  | NA | Other | 2 (0.2%) |
|  |  | 5 mg | Daily | 3 (0.2%) |
|  | Ezetimibe/Atorvastatin | 10 mg | Daily | 1 (0.1%) |
| Fibric Acid Derivatives | Bezafibrate | 200 mg | Daily | 1 (0.1%) |
|  | Bezafibrate | 400 mg | Daily | 5 (0.4%) |
|  | Ciprofibrate | 100 mg | Daily | 4 (0.3%) |
|  | Fenofibrate | 100-200 mg | Daily | 73 (5.9) |
|  |  | 215-320 mg | Daily | 32 (0.6%) |
|  | Gemfibrozil | 450 mg | Daily | 1 (0.1%) |
| Pcsk9 Inhibitors | Alirocumab | 150 mg | Other | 6 (0.5%) |
|  |  | 75 mg | Other | 8 (0.6%) |
|  | Evolocumab | 140 mg | Other | 12 (1.0%) |
| Bile-acid binding resins | Colestipol | 5 mg | Daily | 1 (0.1%) |
| Niacin | Niaspan | 1 g | Daily | 1 (0.1%) |
| PCSK9 = proprotein convertase subtilisin/kexin type 9 | | | | |

| **Table S4A. LDL-C levels (mmol/L) at first and last visit: overall, FH, Secondary prevention and STEMI patients** | | | | | | | | | |
| --- | --- | --- | --- | --- | --- | --- | --- | --- | --- |
|  |  | **Overall** | | **FH** | | **Secondary prevention** | | **STEMI** | |
| **Assessment** | **Statistic** | **Retro.** | **Prosp.** | **Retro.** | **Prosp.** | **Retro.** | **Prosp.** | **Retro.** | **Prosp.** |
| First | N | 1244 | 401 | 307 | 26 | 943 | 271 | 208 | 52 |
|  | Mean | 3.287 | 2.237 | 5.068 | 2.956 | 3.199 | 2.143 | 3.348 | 2.081 |
|  | Median | 2.870 | 2.090 | 5.060 | 2.710 | 2.730 | 1.990 | 2.980 | 1.750 |
|  | SD | 1.6918 | 0.8803 | 1.6811 | 1.1609 | 1.6427 | 0.8686 | 1.7007 | 0.7404 |
|  | (Q1) | 1.990 | 1.630 | 4.060 | 2.190 | 1.920 | 1.500 | 1.965 | 1.605 |
|  | (Q3) | 4.340 | 2.690 | 6.280 | 3.470 | 4.290 | 2.610 | 4.850 | 2.410 |
|  | Range | 0.45-13.6 | 0.25-5.7 | 1.2- 12.32 | 1.25-5.7 | 0.66-9.8 | 0.41-5.7 | 0.66-9.3 | 1.19-4.34 |
| Last | N | 1205 | 165 | 302 | 6 | 916 | 127 | 199 | 29 |
|  | Mean | 2.699 | 2.198 | 3.842 | 2.703 | 2.616 | 2.141 | 2.636 | 2.077 |
|  | Median | 2.400 | 2.150 | 3.700 | 2.820 | 2.330 | 2.140 | 2.320 | 2.000 |
|  | SD | 1.3188 | 0.8409 | 1.5163 | 1.0443 | 1.2635 | 0.7786 | 1.3263 | 0.6741 |
|  | (Q1) | 1.750 | 1.620 | 2.700 | 2.040 | 1.690 | 1.600 | 1.620 | 1.700 |
|  | (Q3) | 3.300 | 2.610 | 4.910 | 3.240 | 3.200 | 2.610 | 3.220 | 2.300 |
|  | Range | 0.34-10.1 | 0.3-4.7 | 0.64-10.1 | 1.12-4.18 | 0.46-7.71 | 0.3-4.7 | 0.83-7.71 | 0.96-3.83 |

| **Table S4B. LDL-C levels (mmol/L) at first and last visit by subgroup: Diabetic and Statin-intolerant patients** | | | | | |
| --- | --- | --- | --- | --- | --- |
|  |  | **Diabetic** | | **Statin-intoleranta** | |
| **Assessment** | **Statistic** | **Retro.** | **Prosp.** | **Retro.** | **Prosp.** |
| First | N | 528 | 214 | 127 | 28 |
|  | Mean | 2.769 | 2.079 | 3.106 | 2.413 |
|  | Median | 2.350 | 1.940 | 2.880 | 2.140 |
|  | SD | 1.4275 | 0.7996 | 1.4427 | 1.2046 |
|  | (Q1) | 1.790 | 1.560 | 1.990 | 1.595 |
|  | (Q3) | 3.385 | 2.500 | 4.060 | 2.790 |
|  | Range | 0.45-13.6 | 0.25-5.6 | 0.53-9.9 | 0.73- 5.7 |
| Last | N | 515 | 78 | 124 | 16 |
|  | Mean | 2.363 | 2.048 | 2.588 | 2.406 |
|  | Median | 2.130 | 1.980 | 2.210 | 2.550 |
|  | SD | 1.1251 | 0.8114 | 1.3256 | 1.1435 |
|  | (Q1) | 1.580 | 1.560 | 1.655 | 1.635 |
|  | (Q3) | 2.900 | 2.300 | 3.165 | 2.980 |
|  | Range | 0.34-6.9 | 0.36-4.7 | 0.34—7.6 | 0.6-4.62 |

a. Patients with adverse events attributed to statin intolerance.

**Table S5.** **Achievement of ESC/EAS-defined LDL-C targets by subgroups, during the observation period**

| Patient subgroup and risk category | Target LDL-C | | Patients (%) | 95% CI |
| --- | --- | --- | --- | --- |
| High-intensity statin treatment? | | | | |
| HR – Yes | <2.5 mmol/L | 10/66 (15.15%) | | (7.51-26.10) |
|  | <2.6 mmol/L* | 13/66 (19.70%) | | (10.93-31.32) |
| HR - No | <2.5 mmol/L) | 24/76 (31.58%) | | (21.39-43.25) |
|  | <2.6 mmol/L* | 28/76 (36.84%) | | (26.06-48.69) |
| VHR – Yes | <1.8 mmol/L | 261/577 (45.23%) | | (41.12-49.40) |
| VHR – No | <1.8 mmol/L | 189/492 (38.41%) | | (34.10-42.87) |
|  |  |  | |  |
| *Familial hypercholesterolaemia* | | | | |
| High Risk (HR) | <2.5 mmol/L | 11/101 (10.89%) | | (5.56-18.65) |
|  | <2.6 mmol/La | 15/101 (14.85%) | | (8.56-23.31) |
| Very High Risk (VHR) | <1.8 mmol/L) | 25/206 (12.14%) | | (8.01-17.39) |
|  |  |  | |  |
| DLNC ≥6 – HR | <2.5 mmol/L | 5/56 (8.9%) | | (2.96-19.62) |
|  | <2.6 mmol/La | 7/56 (12.5%) | | (5.18-24.07) |
| DLNC ≥6 - VHR | <1.8 mmol/L) | 12/114 (10.5%) | | (5.56-17.67) |
|  |  |  | |  |
| DLCN 3-5 – HR | <2.5 mmol/L | 2/28 (7.1%) | | (0.88-23.50) |
|  | <2.6 mmol/La | 3/28 (10.7%) | | (2.27-28.23) |
| DLCN 3-5 – VHR | <1.8 mmol/L | 7/58 (12.1%) | | (4.99-23.30) |
| a. 2016 ESC/EAS target.[8] DLCN = Dutch Lipid Clinic Network score. | | | | |

| **Table S6. Achievement of ESC/EAS-defined LDL-C targets by study phase (overall population; N=1244). Results shown as number and percentage in category with two-sided 95% Confidence intervals** | | | | |
| --- | --- | --- | --- | --- |
| **Assessment** | **Risk Group (LDL-C target)** | **Retrospective** | **Prospective** | **Overall** |
| First | High Risk (<2.5 mmol/L) | 10/151 (6.62%) | 14/39 (35.90%) | 10/151 (6.62%) |
|  |  | *[3.22-11.84]* | *[21.20-52.82]* | *[3.22-11.84]* |
|  | Very High Risk (<1.8 mmol/L) | 228/1093 (20.86%) | 135/362 (37.29%) | 228/1093 (20.86%) |
|  |  | *[18.49-23.39]* | *[32.30-42.50]* | *[18.49-23.39]* |
| Last | High Risk (<2.5 mmol/L) | 27/145 (18.62%) | 2/10 (20.00%) | 28/151 (18.54%) |
|  |  | *[12.64-25.92]* | *[2.52-55.61]* | *[12.69-25.67]* |
|  | Very High Risk (<1.8 mmol/L) | 317/1060 (29.91%) | 56/155 (36.13%) | 328/1093 (30.01%) |
|  |  | *[27.16-32.76]* | *[28.58-44.22]* | *[27.30-32.82]* |
